# Supplementary material
Source: publisher figshare collection journal article supplement (https://tandf.figshare.com/articles/dataset/_/5411515)

# checkCIF/PLATON report

You have not supplied any structure factors. As a result the full set of tests cannot be run.

No syntax errors found.      CIF dictionary      Interpreting this report

## Datablock: lms69

---

Bond precision:    C-C = 0.0104 Å                      Wavelength=0.71073

Cell:                      a=9.865(2)              b=20.857(4)              c=9.4829(19)  
                                alpha=90              beta=90              gamma=90

Temperature:              293 K

|                | Calculated     | Reported    |
|----------------|----------------|-------------|
| Volume         | 1951.2(7)      | 1951.1(7)   |
| Space group    | P c a 21       | Pca2(1)     |
| Hall group     | P 2c -2ac      | ?           |
| Moiety formula | C25 H21 Fe N O | C25H21FeNo  |
| Sum formula    | C25 H21 Fe N O | C25H21FeNo  |
| Mr             | 407.28         | 407.28      |
| Dx,g cm-3      | 1.386          | 1.386       |
| Z              | 4              | 4           |
| Mu (mm-1)      | 0.788          | 0.788       |
| F000           | 848.0          | 848.0       |
| F000'          | 849.64         |             |
| h,k,lmax       | 12,27,12       | 12,27,12    |
| Nref           | 2384[ 4484]    | 4343        |
| Tmin,Tmax      | 0.797,0.889    | 0.058,0.081 |
| Tmin'          | 0.696          |             |

Correction method= MULTI-SCAN

Data completeness= 1.82/0.97              Theta(max)= 27.510

R(reflections)= 0.0844( 4006)              wR2(reflections)= 0.2198( 4343)

S = 1.121                      Npar= 229

---

The following ALERTS were generated. Each ALERT has the format

**test-name\_ALERT\_alert-type\_alert-level.**

Click on the hyperlinks for more details of the test.

---

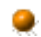

### Alert level B

PLAT201\_ALERT\_2\_B Isotropic non-H Atoms in Main Residue(s) .....

5

---

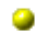

### Alert level C

ABSTY02\_ALERT\_1\_C An \_exptl\_absorpt\_correction\_type has been given without  
a literature citation. This should be contained in the  
\_exptl\_absorpt\_process\_details field.  
Absorption correction given as Multi-scan

STRVA01\_ALERT\_2\_C Chirality of atom sites is inverted?  
From the CIF: \_refine\_ls\_abs\_structure\_Flack 0.960  
From the CIF: \_refine\_ls\_abs\_structure\_Flack\_su 0.040

PLAT041\_ALERT\_1\_C Calc. and Reported SumFormula Strings Differ ?  
PLAT042\_ALERT\_1\_C Calc. and Reported MoietyFormula Strings Differ ?  
PLAT094\_ALERT\_2\_C Ratio of Maximum / Minimum Residual Density .... 2.04  
PLAT220\_ALERT\_2\_C Large Non-Solvent C Ueq(max)/Ueq(min) ... 3.1 Ratio  
PLAT241\_ALERT\_2\_C Check High Ueq as Compared to Neighbors for C1  
PLAT241\_ALERT\_2\_C Check High Ueq as Compared to Neighbors for C2  
PLAT241\_ALERT\_2\_C Check High Ueq as Compared to Neighbors for C4  
PLAT241\_ALERT\_2\_C Check High Ueq as Compared to Neighbors for C5  
PLAT242\_ALERT\_2\_C Check Low Ueq as Compared to Neighbors for Fe1  
PLAT341\_ALERT\_3\_C Low Bond Precision on C-C Bonds ..... 0.0104 Ang  
PLAT369\_ALERT\_2\_C Long C(sp2)-C(sp2) Bond C1 - C2 ... 1.55 Ang.

### Alert level G

CELLZ01\_ALERT\_1\_G Difference between formula and atom\_site contents detected.  
CELLZ01\_ALERT\_1\_G ALERT: Large difference may be due to a  
symmetry error - see SYMMG tests  
From the CIF: \_cell\_formula\_units\_Z 4  
From the CIF: \_chemical\_formula\_sum C25H21FeNO  
TEST: Compare cell contents of formula and atom\_site data  
WARNING: Unexpected atom type is in site list: Fe  
WARNING: Unexpected atom type is in site list: O  
WARNING: Unexpected atom type is in site list: N  
WARNING: Formula and atom\_type\_symbol element names mismatch.

| atom | Z*formula | cif sites | diff |
|------|-----------|-----------|------|
| C    | 100.00    | 100.00    | 0.00 |
| H    | 84.00     | 84.00     | 0.00 |
| FeNO | 4.00      | 0.00      | 4.00 |

WARNING: Site labels do not match formula elements

REFLT03\_ALERT\_4\_G Please check that the estimate of the number of Friedel pairs is  
correct. If it is not, please give the correct count in the  
\_publ\_section\_exptl\_refinement section of the submitted CIF.  
From the CIF: \_diffrn\_reflms\_theta\_max 27.51  
From the CIF: \_reflms\_number\_total 4343  
Count of symmetry unique reflms 2384  
Completeness (\_total/calc) 182.17%  
TEST3: Check Friedels for noncentro structure  
Estimate of Friedel pairs measured 1959  
Fraction of Friedel pairs measured 0.822  
Are heavy atom types Z>Si present yes

PLAT005\_ALERT\_5\_G No \_iucr\_refine\_instructions\_details in CIF .... ?  
PLAT033\_ALERT\_4\_G Flack x Parameter Value Deviates from Zero ..... 0.960  
PLAT072\_ALERT\_2\_G SHELXL First Parameter in WGHT Unusually Large. 0.11  
PLAT199\_ALERT\_1\_G Check the Reported \_cell\_measurement\_temperature 293 K  
PLAT200\_ALERT\_1\_G Check the Reported \_diffrn\_ambient\_temperature 293 K  
PLAT792\_ALERT\_1\_G Note: The Model has Chirality at C11 (Verify) S  
PLAT792\_ALERT\_1\_G Note: The Model has Chirality at C12 (Verify) R

- 
- 0 **ALERT level A** = Most likely a serious problem - resolve or explain
  - 1 **ALERT level B** = A potentially serious problem, consider carefully
  - 13 **ALERT level C** = Check. Ensure it is not caused by an omission or oversight
  - 10 **ALERT level G** = General information/check it is not something unexpected

9 ALERT type 1 CIF construction/syntax error, inconsistent or missing data  
11 ALERT type 2 Indicator that the structure model may be wrong or deficient  
1 ALERT type 3 Indicator that the structure quality may be low  
2 ALERT type 4 Improvement, methodology, query or suggestion  
1 ALERT type 5 Informative message, check

---

---

It is advisable to attempt to resolve as many as possible of the alerts in all categories. Often the minor alerts point to easily fixed oversights, errors and omissions in your CIF or refinement strategy, so attention to these fine details can be worthwhile. In order to resolve some of the more serious problems it may be necessary to carry out additional measurements or structure refinements. However, the purpose of your study may justify the reported deviations and the more serious of these should normally be commented upon in the discussion or experimental section of a paper or in the "special\_details" fields of the CIF. checkCIF was carefully designed to identify outliers and unusual parameters, but every test has its limitations and alerts that are not important in a particular case may appear. Conversely, the absence of alerts does not guarantee there are no aspects of the results needing attention. It is up to the individual to critically assess their own results and, if necessary, seek expert advice.

### **Publication of your CIF in IUCr journals**

A basic structural check has been run on your CIF. These basic checks will be run on all CIFs submitted for publication in IUCr journals (*Acta Crystallographica*, *Journal of Applied Crystallography*, *Journal of Synchrotron Radiation*); however, if you intend to submit to *Acta Crystallographica Section C* or *E*, you should make sure that full publication checks are run on the final version of your CIF prior to submission.

### **Publication of your CIF in other journals**

Please refer to the *Notes for Authors* of the relevant journal for any special instructions relating to CIF submission.

---

**PLATON version of 18/07/2011; check.def file version of 04/07/2011**

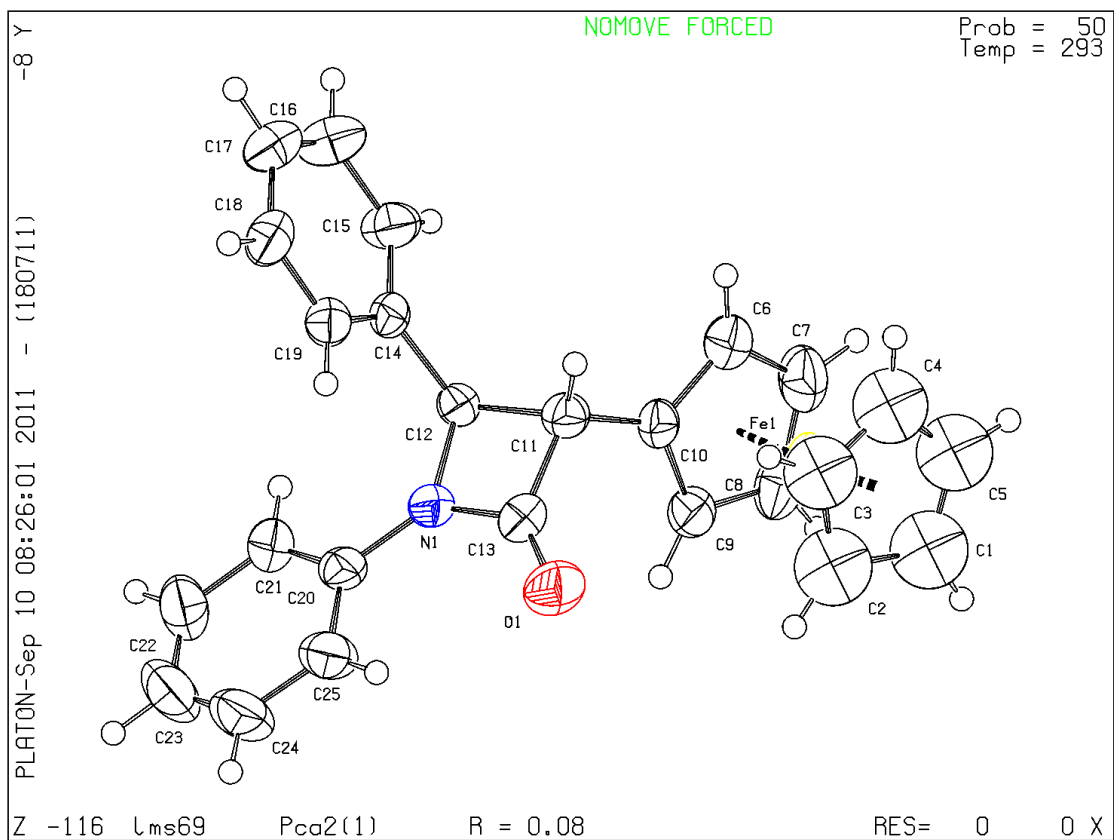

Supplement: Supplementary file 1 [file 2]
