# Supplementary material
Source: publisher figshare collection journal article supplement (https://tandf.figshare.com/articles/dataset/_/5411515)
Supplement: Supplementary file 2 [file 2]

Archive with 3 entries (3 files):
- CCDC735635.cif
- LSYC_A_1378358_Supplemental material.doc
- checkcif-CCDC735635.pdf
