# Supplementary material
Source: publisher figshare collection journal article supplement (https://tandf.figshare.com/articles/dataset/_/5411515)
Supplement: Supplementary file 2 [file 2 › CCDC735635.cif]

_audit_creation_method            SHELXL-97
_publ_contact_author              'Nanyan Fu'
_publ_contact_author_address		
;  College of Chemistry and Chemical Engineering
   Fuzhou University
   Fuzhou,FuJian,350108
   P.R.China
;
_publ_contact_author_email      'nanyan_fu@fzu.edu.cn'
_publ_contact_author_fax 	'+86-591-22866129'
_publ_contact_author_phone	'+86-13459108842'
_publ_contact_letter
;
This file is a new data for deposit, which expected to be 
published in Can. J. Chem.
;
loop_
_publ_author_name
_publ_author_address
'Mingshun Liu'
; College of Chemistry and Chemical Engineering
   Fuzhou University
   Fuzhou,FuJian,350108
   P.R.China
;
'Yaqing Chen'
; College of Chemistry and Chemical Engineering
   Fuzhou University
   Fuzhou,FuJian,350108
   P.R.China
;
'Nanyan Fu'
;  College of Chemistry and Chemical Engineering
   Fuzhou University
   Fuzhou,FuJian,350108
   P.R.China
;
_publ_requested_journal           'Can. J. Chem.' 

data_lms69 
 
_audit_creation_method            SHELXL-97 
_chemical_name_systematic 
; 
 ? 
; 
_chemical_name_common             ? 
_chemical_melting_point           ? 
_chemical_formula_moiety          C25H21FeNO  
_chemical_formula_sum 
 C25H21FeNO  
_chemical_formula_weight          407.28 
 
loop_ 
 _atom_type_symbol 
 _atom_type_description 
 _atom_type_scat_dispersion_real 
 _atom_type_scat_dispersion_imag 
 _atom_type_scat_source 
 'C'  'C'   0.0033   0.0016 
 'International Tables Vol C Tables 4.2.6.8 and 6.1.1.4' 
 'H'  'H'   0.0000   0.0000 
 'International Tables Vol C Tables 4.2.6.8 and 6.1.1.4' 
 'N'  'N'   0.0061   0.0033 
 'International Tables Vol C Tables 4.2.6.8 and 6.1.1.4' 
 'O'  'O'   0.0106   0.0060 
 'International Tables Vol C Tables 4.2.6.8 and 6.1.1.4' 
 'Fe'  'Fe'   0.3463   0.8444 
 'International Tables Vol C Tables 4.2.6.8 and 6.1.1.4' 
 
_symmetry_cell_setting            Orthorhombic 
_symmetry_space_group_name_H-M    Pca2(1) 
 
loop_ 
 _symmetry_equiv_pos_as_xyz 
 'x, y, z' 
 '-x, -y, z+1/2' 
 'x+1/2, -y, z' 
 '-x+1/2, y, z+1/2' 
 
_cell_length_a                    9.865(2) 
_cell_length_b                    20.857(4) 
_cell_length_c                    9.4829(19) 
_cell_angle_alpha                 90.00 
_cell_angle_beta                  90.00 
_cell_angle_gamma                 90.00 
_cell_volume                      1951.1(7) 
_cell_formula_units_Z             4 
_cell_measurement_temperature     293(2) 
_cell_measurement_reflns_used           3575
_cell_measurement_theta_min             3.0098
_cell_measurement_theta_max             27.5087
 
_exptl_crystal_description        block 
_exptl_crystal_colour             yellow 
_exptl_crystal_size_max           0.4600 
_exptl_crystal_size_mid           0.2400 
_exptl_crystal_size_min           0.1500 
_exptl_crystal_density_meas       ? 
_exptl_crystal_density_diffrn     1.386 
_exptl_crystal_density_method     'not measured' 
_exptl_crystal_F_000              848 
_exptl_absorpt_coefficient_mu     0.788 
_exptl_absorpt_correction_type          'Multi-scan'
_exptl_absorpt_correction_T_max         0.081
_exptl_absorpt_correction_T_min         0.058
_exptl_absorpt_process_details    ? 
 
_exptl_special_details 
; 
 ? 
; 
 
_diffrn_ambient_temperature       293(2) 
_diffrn_radiation_wavelength      0.71073 
_diffrn_radiation_type            MoK\a 
_diffrn_radiation_source          'fine-focus sealed tube' 
_diffrn_radiation_monochromator   graphite 
_diffrn_measurement_device_type   'CCD'
_diffrn_measurement_method        'dtprofit.ref' 
_diffrn_detector_area_resol_mean  None
_diffrn_standards_number          None
_diffrn_standards_interval_count  'not measured'
_diffrn_standards_interval_time   'not measured'
_diffrn_standards_decay_%         'not measured'
_diffrn_reflns_number             15791 
_diffrn_reflns_av_R_equivalents   0.0487 
_diffrn_reflns_av_sigmaI/netI     0.0399 
_diffrn_reflns_limit_h_min        -12 
_diffrn_reflns_limit_h_max        11 
_diffrn_reflns_limit_k_min        -27 
_diffrn_reflns_limit_k_max        27 
_diffrn_reflns_limit_l_min        -11 
_diffrn_reflns_limit_l_max        12 
_diffrn_reflns_theta_min          3.14 
_diffrn_reflns_theta_max          27.51 
_reflns_number_total              4343 
_reflns_number_gt                 4006 
_reflns_threshold_expression      >2sigma(I) 
 
_computing_data_collection        'CrystalClear (Rigaku Inc., 2007)' 
_computing_cell_refinement        'CrystalClear (Rigaku Inc., 2007)' 
_computing_data_reduction         'CrystalClear (Rigaku Inc., 2007)'
_computing_structure_solution     'SHELXS-97 (Sheldrick, 1990)' 
_computing_structure_refinement   'SHELXL-97 (Sheldrick, 1997)' 
_computing_molecular_graphics     'ORTEX (P.McArdle, 1995)'
_computing_publication_material   'SHELXL-97/2 (Sheldrick,1997)')'
 
_refine_special_details 
; 
 Refinement of F^2^ against ALL reflections.  The weighted R-factor wR and 
 goodness of fit S are based on F^2^, conventional R-factors R are based 
 on F, with F set to zero for negative F^2^. The threshold expression of 
 F^2^ > 2sigma(F^2^) is used only for calculating R-factors(gt) etc. and is 
 not relevant to the choice of reflections for refinement.  R-factors based 
 on F^2^ are statistically about twice as large as those based on F, and R- 
 factors based on ALL data will be even larger. 
; 
 
_refine_ls_structure_factor_coef  Fsqd  
_refine_ls_matrix_type            full 
_refine_ls_weighting_scheme       calc  
_refine_ls_weighting_details 
 'calc w=1/[\s^2^(Fo^2^)+(0.1064P)^2^+2.6033P] where P=(Fo^2^+2Fc^2^)/3' 
_atom_sites_solution_primary      direct 
_atom_sites_solution_secondary    difmap 
_atom_sites_solution_hydrogens    geom 
_refine_ls_hydrogen_treatment     constr 
_refine_ls_extinction_method      SHELXL 
_refine_ls_extinction_coef        0.00211(12) 
_refine_ls_extinction_expression 
 'Fc^*^=kFc[1+0.001xFc^2^\l^3^/sin(2\q)]^-1/4^' 
_refine_ls_abs_structure_details 
 'Flack H D (1983), Acta Cryst. A39, 876-881' 
_refine_ls_abs_structure_Flack    0.96(4) 
_refine_ls_number_reflns          4343 
_refine_ls_number_parameters      229 
_refine_ls_number_restraints      1 
_refine_ls_R_factor_all           0.0896 
_refine_ls_R_factor_gt            0.0844 
_refine_ls_wR_factor_ref          0.2198 
_refine_ls_wR_factor_gt           0.2148 
_refine_ls_goodness_of_fit_ref    1.121 
_refine_ls_restrained_S_all       1.121 
_refine_ls_shift/su_max           0.001 
_refine_ls_shift/su_mean          0.000 
 
loop_ 
 _atom_site_label 
 _atom_site_type_symbol 
 _atom_site_fract_x 
 _atom_site_fract_y 
 _atom_site_fract_z 
 _atom_site_U_iso_or_equiv 
 _atom_site_adp_type 
 _atom_site_occupancy 
 _atom_site_symmetry_multiplicity 
 _atom_site_calc_flag 
 _atom_site_refinement_flags 
 _atom_site_disorder_assembly 
 _atom_site_disorder_group 
Fe1 Fe 0.02237(8) 0.10922(4) 0.29202(13) 0.0525(3) Uani 1 1 d . . . 
O1 O -0.0017(4) 0.2836(3) 0.4604(6) 0.0619(13) Uani 1 1 d . . . 
N1 N 0.1840(4) 0.3299(2) 0.3458(5) 0.0408(10) Uani 1 1 d . . . 
C1 C -0.1563(12) 0.0649(5) 0.3237(13) 0.107(3) Uiso 1 1 d . . . 
H1 H -0.2242 0.0604 0.2564 0.128 Uiso 1 1 calc R . . 
C2 C -0.1346(13) 0.1226(6) 0.4249(14) 0.106(3) Uiso 1 1 d . . . 
H2 H -0.1840 0.1605 0.4316 0.128 Uiso 1 1 calc R . . 
C3 C -0.0258(11) 0.1038(5) 0.5007(14) 0.094(3) Uiso 1 1 d . . . 
H3 H 0.0131 0.1278 0.5727 0.113 Uiso 1 1 calc R . . 
C4 C 0.0185(11) 0.0468(6) 0.4596(13) 0.099(3) Uiso 1 1 d . . . 
H4 H 0.0923 0.0254 0.4984 0.119 Uiso 1 1 calc R . . 
C5 C -0.0596(12) 0.0241(6) 0.3524(13) 0.103(3) Uiso 1 1 d . . . 
H5 H -0.0462 -0.0147 0.3063 0.124 Uiso 1 1 calc R . . 
C6 C 0.2204(6) 0.1202(3) 0.2367(7) 0.0520(14) Uani 1 1 d . . . 
H6 H 0.2941 0.1034 0.2853 0.062 Uiso 1 1 calc R . . 
C7 C 0.1486(8) 0.0890(3) 0.1256(8) 0.0623(17) Uani 1 1 d . . . 
H7 H 0.1678 0.0488 0.0881 0.075 Uiso 1 1 calc R . . 
C8 C 0.0420(8) 0.1309(4) 0.0826(8) 0.0611(18) Uani 1 1 d . . . 
H8 H -0.0215 0.1227 0.0124 0.073 Uiso 1 1 calc R . . 
C9 C 0.0496(6) 0.1872(3) 0.1657(6) 0.0463(13) Uani 1 1 d . . . 
H9 H -0.0083 0.2223 0.1593 0.056 Uiso 1 1 calc R . . 
C10 C 0.1608(5) 0.1812(2) 0.2607(5) 0.0401(12) Uani 1 1 d . . . 
C11 C 0.2107(5) 0.2304(2) 0.3626(6) 0.0403(11) Uani 1 1 d . . . 
H11 H 0.2548 0.2110 0.4448 0.048 Uiso 1 1 calc R . . 
C12 C 0.2946(4) 0.28749(19) 0.3002(7) 0.0360(9) Uani 1 1 d . . . 
H12 H 0.3005 0.2851 0.1972 0.043 Uiso 1 1 calc R . . 
C13 C 0.1082(5) 0.2824(3) 0.4044(6) 0.0416(12) Uani 1 1 d . . . 
C14 C 0.4322(5) 0.3010(2) 0.3666(6) 0.0347(10) Uani 1 1 d . . . 
C15 C 0.5466(5) 0.2761(3) 0.3032(9) 0.0533(14) Uani 1 1 d . . . 
H15 H 0.5406 0.2534 0.2189 0.064 Uiso 1 1 calc R . . 
C16 C 0.6728(6) 0.2858(4) 0.3698(8) 0.0641(18) Uani 1 1 d . . . 
H16 H 0.7505 0.2687 0.3291 0.077 Uiso 1 1 calc R . . 
C17 C 0.6837(6) 0.3197(3) 0.4927(7) 0.0549(15) Uani 1 1 d . . . 
H17 H 0.7675 0.3250 0.5360 0.066 Uiso 1 1 calc R . . 
C18 C 0.5679(6) 0.3462(3) 0.5518(7) 0.0515(14) Uani 1 1 d . . . 
H18 H 0.5741 0.3702 0.6342 0.062 Uiso 1 1 calc R . . 
C19 C 0.4427(6) 0.3368(3) 0.4882(6) 0.0417(11) Uani 1 1 d . . . 
H19 H 0.3654 0.3548 0.5280 0.050 Uiso 1 1 calc R . . 
C20 C 0.1640(5) 0.3964(2) 0.3272(6) 0.0416(13) Uani 1 1 d . . . 
C21 C 0.2461(7) 0.4304(3) 0.2376(7) 0.0526(14) Uani 1 1 d . . . 
H21 H 0.3162 0.4095 0.1909 0.063 Uiso 1 1 calc R . . 
C22 C 0.2258(8) 0.4958(3) 0.2155(11) 0.074(2) Uani 1 1 d . . . 
H22 H 0.2815 0.5184 0.1539 0.088 Uiso 1 1 calc R . . 
C23 C 0.1249(8) 0.5259(3) 0.2844(12) 0.078(2) Uani 1 1 d . . . 
H23 H 0.1105 0.5694 0.2695 0.093 Uiso 1 1 calc R . . 
C24 C 0.0418(8) 0.4925(4) 0.3778(10) 0.072(2) Uani 1 1 d . . . 
H24 H -0.0260 0.5142 0.4264 0.087 Uiso 1 1 calc R . . 
C25 C 0.0590(7) 0.4280(3) 0.3989(8) 0.0553(15) Uani 1 1 d . . . 
H25 H 0.0021 0.4056 0.4597 0.066 Uiso 1 1 calc R . . 
 
loop_ 
 _atom_site_aniso_label 
 _atom_site_aniso_U_11 
 _atom_site_aniso_U_22 
 _atom_site_aniso_U_33 
 _atom_site_aniso_U_23 
 _atom_site_aniso_U_13 
 _atom_site_aniso_U_12 
Fe1 0.0580(5) 0.0424(4) 0.0572(5) 0.0077(5) -0.0023(6) -0.0172(3) 
O1 0.042(2) 0.071(3) 0.073(3) -0.006(2) 0.019(2) 0.001(2) 
N1 0.032(2) 0.038(2) 0.052(3) -0.0057(18) -0.0009(18) 0.0021(16) 
C6 0.050(3) 0.046(3) 0.060(4) -0.003(3) -0.006(3) -0.006(2) 
C7 0.072(4) 0.047(3) 0.067(4) -0.016(3) 0.006(4) -0.011(3) 
C8 0.071(4) 0.065(4) 0.047(4) 0.001(3) -0.008(3) -0.024(3) 
C9 0.046(3) 0.042(3) 0.051(3) 0.015(2) -0.008(2) -0.005(2) 
C10 0.039(2) 0.033(2) 0.048(3) 0.006(2) -0.001(2) -0.0070(18) 
C11 0.037(3) 0.041(3) 0.044(3) 0.005(2) -0.002(2) 0.000(2) 
C12 0.034(2) 0.0316(19) 0.042(2) -0.007(2) -0.001(3) 0.0021(15) 
C13 0.036(3) 0.047(3) 0.042(3) 0.000(2) -0.002(2) -0.005(2) 
C14 0.032(2) 0.031(2) 0.041(3) 0.004(2) 0.007(2) -0.0046(18) 
C15 0.040(3) 0.062(3) 0.057(4) -0.007(4) -0.007(3) 0.008(2) 
C16 0.039(3) 0.088(5) 0.065(4) -0.001(4) 0.001(3) 0.007(3) 
C17 0.036(3) 0.070(4) 0.059(4) 0.004(3) -0.002(3) -0.004(3) 
C18 0.045(3) 0.053(3) 0.056(4) 0.000(3) -0.005(3) -0.012(3) 
C19 0.040(3) 0.038(3) 0.047(3) -0.003(2) 0.002(2) -0.002(2) 
C20 0.037(2) 0.041(3) 0.047(3) -0.007(2) -0.013(2) 0.0039(19) 
C21 0.048(3) 0.042(3) 0.068(4) -0.002(3) -0.008(3) -0.006(2) 
C22 0.081(5) 0.041(3) 0.099(6) 0.005(4) -0.019(5) -0.009(3) 
C23 0.097(5) 0.039(3) 0.098(5) -0.005(4) -0.017(6) 0.016(3) 
C24 0.070(5) 0.054(4) 0.093(6) -0.016(4) -0.009(4) 0.025(3) 
C25 0.049(3) 0.053(3) 0.064(4) -0.007(3) -0.007(3) 0.013(3) 
 
_geom_special_details 
; 
 All esds (except the esd in the dihedral angle between two l.s. planes) 
 are estimated using the full covariance matrix.  The cell esds are taken 
 into account individually in the estimation of esds in distances, angles 
 and torsion angles; correlations between esds in cell parameters are only 
 used when they are defined by crystal symmetry.  An approximate (isotropic) 
 treatment of cell esds is used for estimating esds involving l.s. planes. 
; 
 
loop_ 
 _geom_bond_atom_site_label_1 
 _geom_bond_atom_site_label_2 
 _geom_bond_distance 
 _geom_bond_site_symmetry_2 
 _geom_bond_publ_flag 
Fe1 C1 2.012(11) . ? 
Fe1 C2 2.016(13) . ? 
Fe1 C5 2.033(12) . ? 
Fe1 C6 2.036(6) . ? 
Fe1 C3 2.038(13) . ? 
Fe1 C9 2.038(6) . ? 
Fe1 C8 2.045(7) . ? 
Fe1 C10 2.051(5) . ? 
Fe1 C4 2.054(13) . ? 
Fe1 C7 2.054(8) . ? 
O1 C13 1.208(7) . ? 
N1 C13 1.359(7) . ? 
N1 C20 1.412(7) . ? 
N1 C12 1.469(6) . ? 
C1 C5 1.307(14) . ? 
C1 C2 1.554(16) . ? 
C1 H1 0.9300 . ? 
C2 C3 1.349(16) . ? 
C2 H2 0.9300 . ? 
C3 C4 1.325(16) . ? 
C3 H3 0.9300 . ? 
C4 C5 1.361(16) . ? 
C4 H4 0.9300 . ? 
C5 H5 0.9300 . ? 
C6 C10 1.419(8) . ? 
C6 C7 1.427(9) . ? 
C6 H6 0.9300 . ? 
C7 C8 1.427(11) . ? 
C7 H7 0.9300 . ? 
C8 C9 1.416(10) . ? 
C8 H8 0.9300 . ? 
C9 C10 1.426(8) . ? 
C9 H9 0.9300 . ? 
C10 C11 1.492(7) . ? 
C11 C13 1.536(7) . ? 
C11 C12 1.567(7) . ? 
C11 H11 0.9800 . ? 
C12 C14 1.522(7) . ? 
C12 H12 0.9800 . ? 
C14 C19 1.377(8) . ? 
C14 C15 1.381(8) . ? 
C15 C16 1.410(9) . ? 
C15 H15 0.9300 . ? 
C16 C17 1.368(11) . ? 
C16 H16 0.9300 . ? 
C17 C18 1.386(9) . ? 
C17 H17 0.9300 . ? 
C18 C19 1.389(8) . ? 
C18 H18 0.9300 . ? 
C19 H19 0.9300 . ? 
C20 C21 1.371(9) . ? 
C20 C25 1.404(8) . ? 
C21 C22 1.396(8) . ? 
C21 H21 0.9300 . ? 
C22 C23 1.346(12) . ? 
C22 H22 0.9300 . ? 
C23 C24 1.394(13) . ? 
C23 H23 0.9300 . ? 
C24 C25 1.370(10) . ? 
C24 H24 0.9300 . ? 
C25 H25 0.9300 . ? 
 
loop_ 
 _geom_angle_atom_site_label_1 
 _geom_angle_atom_site_label_2 
 _geom_angle_atom_site_label_3 
 _geom_angle 
 _geom_angle_site_symmetry_1 
 _geom_angle_site_symmetry_3 
 _geom_angle_publ_flag 
C1 Fe1 C2 45.4(5) . . ? 
C1 Fe1 C5 37.7(4) . . ? 
C2 Fe1 C5 68.8(5) . . ? 
C1 Fe1 C6 158.5(4) . . ? 
C2 Fe1 C6 152.0(4) . . ? 
C5 Fe1 C6 123.6(4) . . ? 
C1 Fe1 C3 68.0(5) . . ? 
C2 Fe1 C3 38.9(4) . . ? 
C5 Fe1 C3 65.5(5) . . ? 
C6 Fe1 C3 118.7(4) . . ? 
C1 Fe1 C9 124.7(4) . . ? 
C2 Fe1 C9 111.0(4) . . ? 
C5 Fe1 C9 156.2(4) . . ? 
C6 Fe1 C9 68.4(2) . . ? 
C3 Fe1 C9 130.2(4) . . ? 
C1 Fe1 C8 109.2(4) . . ? 
C2 Fe1 C8 130.5(4) . . ? 
C5 Fe1 C8 120.3(4) . . ? 
C6 Fe1 C8 68.5(3) . . ? 
C3 Fe1 C8 167.6(4) . . ? 
C9 Fe1 C8 40.6(3) . . ? 
C1 Fe1 C10 160.2(3) . . ? 
C2 Fe1 C10 120.0(4) . . ? 
C5 Fe1 C10 160.9(4) . . ? 
C6 Fe1 C10 40.6(2) . . ? 
C3 Fe1 C10 109.6(4) . . ? 
C9 Fe1 C10 40.8(2) . . ? 
C8 Fe1 C10 68.6(2) . . ? 
C1 Fe1 C4 65.0(5) . . ? 
C2 Fe1 C4 65.8(5) . . ? 
C5 Fe1 C4 38.9(5) . . ? 
C6 Fe1 C4 106.8(4) . . ? 
C3 Fe1 C4 37.8(4) . . ? 
C9 Fe1 C4 164.3(4) . . ? 
C8 Fe1 C4 153.2(4) . . ? 
C10 Fe1 C4 126.0(3) . . ? 
C1 Fe1 C7 123.5(4) . . ? 
C2 Fe1 C7 167.0(4) . . ? 
C5 Fe1 C7 106.2(4) . . ? 
C6 Fe1 C7 40.8(3) . . ? 
C3 Fe1 C7 151.2(4) . . ? 
C9 Fe1 C7 68.4(3) . . ? 
C8 Fe1 C7 40.7(3) . . ? 
C10 Fe1 C7 68.6(2) . . ? 
C4 Fe1 C7 118.4(4) . . ? 
C13 N1 C20 133.6(5) . . ? 
C13 N1 C12 95.2(4) . . ? 
C20 N1 C12 131.2(4) . . ? 
C5 C1 C2 106.0(11) . . ? 
C5 C1 Fe1 72.0(7) . . ? 
C2 C1 Fe1 67.4(6) . . ? 
C5 C1 H1 127.0 . . ? 
C2 C1 H1 127.0 . . ? 
Fe1 C1 H1 125.1 . . ? 
C3 C2 C1 102.3(10) . . ? 
C3 C2 Fe1 71.5(8) . . ? 
C1 C2 Fe1 67.2(6) . . ? 
C3 C2 H2 128.8 . . ? 
C1 C2 H2 128.8 . . ? 
Fe1 C2 H2 124.2 . . ? 
C4 C3 C2 111.5(12) . . ? 
C4 C3 Fe1 71.8(8) . . ? 
C2 C3 Fe1 69.7(8) . . ? 
C4 C3 H3 124.3 . . ? 
C2 C3 H3 124.3 . . ? 
Fe1 C3 H3 125.9 . . ? 
C3 C4 C5 110.2(12) . . ? 
C3 C4 Fe1 70.5(8) . . ? 
C5 C4 Fe1 69.7(7) . . ? 
C3 C4 H4 124.9 . . ? 
C5 C4 H4 124.9 . . ? 
Fe1 C4 H4 126.5 . . ? 
C1 C5 C4 110.0(12) . . ? 
C1 C5 Fe1 70.3(7) . . ? 
C4 C5 Fe1 71.4(7) . . ? 
C1 C5 H5 125.0 . . ? 
C4 C5 H5 125.0 . . ? 
Fe1 C5 H5 124.9 . . ? 
C10 C6 C7 108.8(6) . . ? 
C10 C6 Fe1 70.3(3) . . ? 
C7 C6 Fe1 70.3(4) . . ? 
C10 C6 H6 125.6 . . ? 
C7 C6 H6 125.6 . . ? 
Fe1 C6 H6 125.4 . . ? 
C6 C7 C8 107.3(6) . . ? 
C6 C7 Fe1 68.9(4) . . ? 
C8 C7 Fe1 69.3(4) . . ? 
C6 C7 H7 126.4 . . ? 
C8 C7 H7 126.4 . . ? 
Fe1 C7 H7 127.0 . . ? 
C9 C8 C7 108.1(6) . . ? 
C9 C8 Fe1 69.4(4) . . ? 
C7 C8 Fe1 70.0(4) . . ? 
C9 C8 H8 126.0 . . ? 
C7 C8 H8 126.0 . . ? 
Fe1 C8 H8 126.2 . . ? 
C8 C9 C10 108.6(6) . . ? 
C8 C9 Fe1 70.0(4) . . ? 
C10 C9 Fe1 70.1(3) . . ? 
C8 C9 H9 125.7 . . ? 
C10 C9 H9 125.7 . . ? 
Fe1 C9 H9 125.8 . . ? 
C6 C10 C9 107.2(5) . . ? 
C6 C10 C11 125.7(5) . . ? 
C9 C10 C11 127.0(5) . . ? 
C6 C10 Fe1 69.1(3) . . ? 
C9 C10 Fe1 69.1(3) . . ? 
C11 C10 Fe1 129.0(4) . . ? 
C10 C11 C13 115.9(4) . . ? 
C10 C11 C12 116.9(5) . . ? 
C13 C11 C12 84.7(4) . . ? 
C10 C11 H11 112.2 . . ? 
C13 C11 H11 112.2 . . ? 
C12 C11 H11 112.2 . . ? 
N1 C12 C14 115.4(4) . . ? 
N1 C12 C11 87.4(4) . . ? 
C14 C12 C11 117.2(4) . . ? 
N1 C12 H12 111.6 . . ? 
C14 C12 H12 111.6 . . ? 
C11 C12 H12 111.6 . . ? 
O1 C13 N1 131.2(6) . . ? 
O1 C13 C11 136.0(5) . . ? 
N1 C13 C11 92.7(4) . . ? 
C19 C14 C15 120.5(5) . . ? 
C19 C14 C12 120.9(5) . . ? 
C15 C14 C12 118.6(5) . . ? 
C14 C15 C16 118.2(7) . . ? 
C14 C15 H15 120.9 . . ? 
C16 C15 H15 120.9 . . ? 
C17 C16 C15 121.7(6) . . ? 
C17 C16 H16 119.2 . . ? 
C15 C16 H16 119.2 . . ? 
C16 C17 C18 119.0(6) . . ? 
C16 C17 H17 120.5 . . ? 
C18 C17 H17 120.5 . . ? 
C17 C18 C19 120.1(6) . . ? 
C17 C18 H18 120.0 . . ? 
C19 C18 H18 120.0 . . ? 
C14 C19 C18 120.5(5) . . ? 
C14 C19 H19 119.8 . . ? 
C18 C19 H19 119.8 . . ? 
C21 C20 C25 119.5(6) . . ? 
C21 C20 N1 120.2(5) . . ? 
C25 C20 N1 120.3(5) . . ? 
C20 C21 C22 120.9(7) . . ? 
C20 C21 H21 119.5 . . ? 
C22 C21 H21 119.5 . . ? 
C23 C22 C21 119.3(8) . . ? 
C23 C22 H22 120.4 . . ? 
C21 C22 H22 120.4 . . ? 
C22 C23 C24 120.7(6) . . ? 
C22 C23 H23 119.6 . . ? 
C24 C23 H23 119.6 . . ? 
C25 C24 C23 120.7(7) . . ? 
C25 C24 H24 119.6 . . ? 
C23 C24 H24 119.6 . . ? 
C24 C25 C20 118.8(7) . . ? 
C24 C25 H25 120.6 . . ? 
C20 C25 H25 120.6 . . ? 
 
_diffrn_measured_fraction_theta_max    0.992 
_diffrn_reflns_theta_full              27.51 
_diffrn_measured_fraction_theta_full   0.992 
_refine_diff_density_max    0.877 
_refine_diff_density_min   -0.430 
_refine_diff_density_rms    0.084 
